# Supplementary material for: S100A8-Mediated NLRP3 Inflammasome-Dependent Pyroptosis in Macrophages Facilitates Liver Fibrosis Progression
Source: MDPI journal article supplement (doi:10.3390/cells11223579), 2022-11-12
Supplement: s1 [file s1]

# Supplementary Materials:

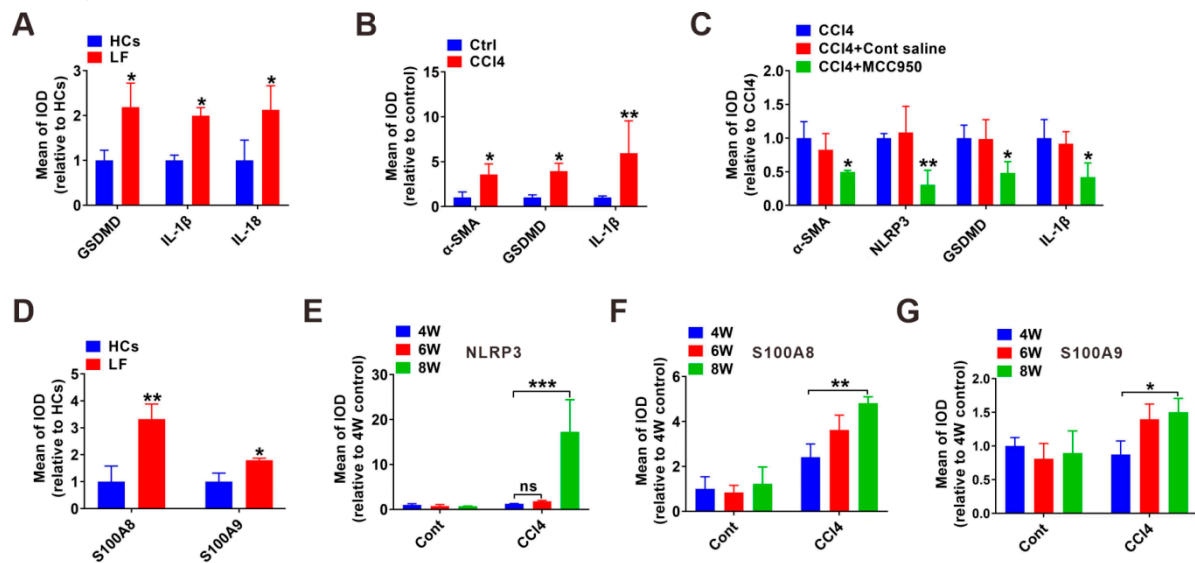

**Figure S1.** The mean of integrated optical density (IOD) analysis for all IHC staining utilizing the Image Pro Plus software. (A) The levels of GSDMD, IL-1β and IL-18 in liver sections from liver fibrosis patients were quantified by densitometry and are shown as fold changes relative to the HCs. (B) The levels of α-SMA, GSDMD and IL-1β in liver sections from CCl4 group mouse were quantified by densitometry and are shown as fold changes relative to vehicle group mouse. (C) The levels of α-SMA, NLRP3, GSDMD and IL-1β in liver sections from CCl4+Cont saline group mouse or CCl4+MCC950 group mouse were quantified by densitometry and are shown as fold changes relative to CCl4 group mouse. (D) The levels of S100A8 and S100A9 in liver sections from liver fibrosis patients were quantified by densitometry and are shown as fold changes relative to the HCs. (E–G) The levels of NLRP3 (E), S100A8 (F) and S100A9 (G) in liver sections from CCl4 group mouse were quantified by densitometry and are shown as fold changes relative to vehicle group mouse. ns, not significant; \*  $p < 0.05$ , \*\*  $p < 0.01$ , \*\*\*  $p < 0.001$ .

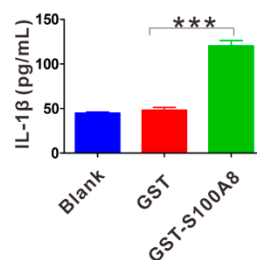

**Figure S2.** ELISA analysis for IL-1β levels in supernatants from THP-1 treated with 5 μg/ml GST or rhS100A8. \*\*\*  $p < 0.001$ .
